# Supplementary material for: The design and construction of a series of metal–organic coordination polymers based on two isomeric semi-rigid bis-pyridyl-bis-amide ligands and three aromatic polycarboxylates
Source: Royal Society of Chemistry journal article supplement (doi:10.1039/c3ce41498a), 2013-01-01
Supplement: c3ce41498a.pdf [file c3ce41498a.pdf]

Supplementary Material (ESI) for CrystEngComm  
This journal is © The Royal Society of Chemistry

**Design and construction of a series of metal–organic coordination polymers based on two isomeric semi-rigid bis-pyridyl-bis-amide ligands and three aromatic polycarboxylates †**

Xiuli Wang,\* Jian Luan, Hongyan Lin, Chuang Xu, Guocheng Liu, Juwen Zhang, and Aixiang Tian

Table S1 Selected bond distances (Å) and angles (°) for complexes 1–9.

| Complex 1                                                                         |            |                     |            |
|-----------------------------------------------------------------------------------|------------|---------------------|------------|
| Cu(1)-O(7)#1                                                                      | 1.979(3)   | Cu(2)-O(5)#3        | 1.951(3)   |
| Cu(1)-O(7)                                                                        | 1.979(3)   | Cu(2)-O(3)          | 1.995(3)   |
| Cu(1)-N(5)#1                                                                      | 2.019(4)   | Cu(2)-N(3)          | 2.044(4)   |
| Cu(1)-N(5)                                                                        | 2.019(4)   | Cu(2)-N(4)          | 2.048(4)   |
| Cu(2)-O(1)#2                                                                      | 2.176(3)   | O(5)#3-Cu(2)-O(3)   | 153.61(14) |
| O(7)#1-Cu(1)-O(7)                                                                 | 179.998(1) | O(5)#3-Cu(2)-N(3)   | 93.53(16)  |
| O(7)#1-Cu(1)-N(5)#1                                                               | 87.36(16)  | O(3)-Cu(2)-N(3)     | 90.30(15)  |
| O(7)-Cu(1)-N(5)#1                                                                 | 92.63(16)  | O(5)#3-Cu(2)-N(4)   | 88.78(16)  |
| O(7)#1-Cu(1)-N(5)                                                                 | 92.64(16)  | O(3)-Cu(2)-N(4)     | 86.24(15)  |
| O(7)-Cu(1)-N(5)                                                                   | 87.37(16)  | N(3)-Cu(2)-N(4)     | 176.08(16) |
| N(5)#1-Cu(1)-N(5)                                                                 | 179.998(1) | O(5)#3-Cu(2)-O(1)#2 | 107.19(14) |
| N(3)-Cu(2)-O(1)#2                                                                 | 92.70(15)  | O(3)-Cu(2)-O(1)#2   | 98.68(14)  |
| N(4)-Cu(2)-O(1)#2                                                                 | 89.64(16)  |                     |            |
| Symmetry code for 1: #1 $-x, -y + 1, -z + 1$ ; #2 $-x, -y, -z$ ; #3 $x + 1, y, z$ |            |                     |            |
| Complex 2                                                                         |            |                     |            |
| Cu(1)-O(1)                                                                        | 1.941(2)   | Cu(2)-O(3)#2        | 1.953(3)   |
| Cu(1)-O(5)                                                                        | 2.006(2)   | Cu(2)-N(2)          | 2.006(4)   |
| Cu(1)-N(1)                                                                        | 2.029(3)   | Cu(2)-N(2)#2        | 2.006(4)   |
| Cu(1)-N(5)#1                                                                      | 2.049(3)   | Cu(1)-O(1W)         | 2.272(3)   |
| Cu(2)-O(3)                                                                        | 1.953(3)   | O(3)#2-Cu(2)-N(2)   | 92.34(14)  |
| O(1)-Cu(1)-O(5)                                                                   | 177.36(10) | O(3)-Cu(2)-N(2)#2   | 92.34(14)  |
| O(1)-Cu(1)-N(1)                                                                   | 93.46(12)  | O(3)#2-Cu(2)-N(2)#2 | 156.35(13) |
| O(5)-Cu(1)-N(1)                                                                   | 84.63(11)  | N(2)-Cu(2)-N(2)#2   | 94.4(2)    |
| O(1)-Cu(1)-N(5)#1                                                                 | 92.06(11)  | N(1)-Cu(1)-O(1W)    | 91.95(12)  |
| O(5)-Cu(1)-N(5)#1                                                                 | 89.69(11)  | N(5)#1-Cu(1)-O(1W)  | 93.08(12)  |
| N(1)-Cu(1)-N(5)#1                                                                 | 172.60(12) | O(3)-Cu(2)-O(3)#2   | 90.46(18)  |
| O(1)-Cu(1)-O(1W)                                                                  | 88.87(13)  | O(3)-Cu(2)-N(2)     | 156.35(13) |
| O(5)-Cu(1)-O(1W)                                                                  | 93.01(12)  |                     |            |
| Symmetry code for 2: #1 $x + 1, -y, z + 1/2$ ; #2 $-x + 1, y, -z + 1/2$           |            |                     |            |
| Complex 3                                                                         |            |                     |            |
| Cu(1)-O(3)                                                                        | 1.9434(15) | Cu(1)-O(1W)         | 2.2789(19) |

**Supplementary Material (ESI) for CrystEngComm**  
**This journal is © The Royal Society of Chemistry**

---

|                     |            |                    |            |
|---------------------|------------|--------------------|------------|
| Cu(1)-O(6)#1        | 1.9869(15) | Cu(1)-N(4)#2       | 2.0466(19) |
| Cu(1)-N(1)          | 2.0458(19) | N(1)-Cu(1)-N(4)#2  | 174.23(8)  |
| O(3)-Cu(1)-O(6)#1   | 145.59(7)  | O(3)-Cu(1)-O(1W)   | 113.35(7)  |
| O(3)-Cu(1)-N(1)     | 91.33(7)   | O(6)#1-Cu(1)-O(1W) | 101.04(7)  |
| O(6)#1-Cu(1)-N(1)   | 89.03(7)   | N(1)-Cu(1)-O(1W)   | 87.00(8)   |
| O(3)-Cu(1)-N(4)#2   | 91.83(7)   | N(4)#2-Cu(1)-O(1W) | 87.32(7)   |
| O(6)#1-Cu(1)-N(4)#2 | 91.08(7)   |                    |            |

Symmetry code for **3**: #1  $x - 1, y, z$ ; #2  $-x + 3/2, y - 1/2, -z + 1/2$

**Complex 4**

|                     |            |                    |            |
|---------------------|------------|--------------------|------------|
| Co(1)-O(1)          | 1.9807(13) | Co(1)-N(1)         | 2.1900(15) |
| Co(1)-O(4)#1        | 2.0439(13) | Co(1)-N(2)#2       | 2.1843(16) |
| Co(1)-O(1W)         | 2.0893(14) | O(1W)-Co(1)-N(2)#2 | 87.52(6)   |
| O(1)-Co(1)-O(4)#1   | 140.98(6)  | O(1)-Co(1)-N(1)    | 92.17(6)   |
| O(1)-Co(1)-O(1W)    | 122.00(6)  | O(4)#1-Co(1)-N(1)  | 90.41(6)   |
| O(4)#1-Co(1)-O(1W)  | 97.00(5)   | O(1W)-Co(1)-N(1)   | 87.88(6)   |
| O(1)-Co(1)-N(2)#2   | 91.06(6)   | N(2)#2-Co(1)-N(1)  | 175.31(6)  |
| O(4)#1-Co(1)-N(2)#2 | 89.21(6)   |                    |            |

Symmetry code for **4**: #1  $x - 1, y, z$ ; #2  $-x + 1/2, y + 1/2, -z + 3/2$

**Complex 5**

|                    |            |                     |            |
|--------------------|------------|---------------------|------------|
| Ni(1)-O(1)         | 1.9772(11) | Ni(1)-O(2)#1        | 2.2418(12) |
| Ni(1)-O(3)#1       | 2.0532(11) | Ni(1)-N(1)          | 2.1335(14) |
| Ni(1)-O(1W)        | 2.0788(13) | Ni(1)-N(2)          | 2.1242(14) |
| O(1)-Ni(1)-O(3)#1  | 154.00(5)  | O(3)#1-Ni(1)-O(2)#1 | 61.43(4)   |
| O(1)-Ni(1)-O(1W)   | 109.83(5)  | O(1W)-Ni(1)-O(2)#1  | 157.59(5)  |
| O(3)#1-Ni(1)-O(1W) | 96.16(5)   | N(2)-Ni(1)-O(2)#1   | 92.01(5)   |
| O(1)-Ni(1)-N(2)    | 91.30(5)   | N(1)-Ni(1)-O(2)#1   | 92.14(5)   |
| O(3)#1-Ni(1)-N(2)  | 89.15(5)   | O(1W)-Ni(1)-N(1)    | 87.73(5)   |
| O(1W)-Ni(1)-N(2)   | 87.30(6)   | N(2)-Ni(1)-N(1)     | 174.90(5)  |
| O(1)-Ni(1)-N(1)    | 91.46(5)   | O(1)-Ni(1)-O(2)#1   | 92.58(4)   |
| O(3)#1-Ni(1)-N(1)  | 90.24(5)   |                     |            |

Symmetry code for **5**: #1  $x + 1, y, z$

**Complex 6**

|                     |            |                    |            |
|---------------------|------------|--------------------|------------|
| Zn(1)-O(1)          | 1.9515(14) | Zn(1)-N(1)         | 2.2343(18) |
| Zn(1)-O(2)#1        | 1.9836(14) | Zn(1)-N(2)#2       | 2.2308(18) |
| Zn(1)-O(1W)         | 2.0457(15) | O(1W)-Zn(1)-N(2)#2 | 86.59(7)   |
| O(1)-Zn(1)-O(2)#1   | 129.89(6)  | O(1)-Zn(1)-N(1)    | 92.67(7)   |
| O(1)-Zn(1)-O(1W)    | 124.84(6)  | O(2)#1-Zn(1)-N(1)  | 90.10(6)   |
| O(2)#1-Zn(1)-O(1W)  | 105.25(6)  | O(1W)-Zn(1)-N(1)   | 88.28(7)   |
| O(1)-Zn(1)-N(2)#2   | 91.17(7)   | N(2)#2-Zn(1)-N(1)  | 174.75(7)  |
| O(2)#1-Zn(1)-N(2)#2 | 90.17(6)   |                    |            |

Symmetry code for **6**: #1  $x + 1, y, z$ ; #2  $-x + 1/2, y + 1/2, -z + 1/2$

**Complex 7**

|              |          |              |          |
|--------------|----------|--------------|----------|
| Cd(1)-O(1)   | 2.306(3) | Cd(1)-O(4)#2 | 2.431(3) |
| Cd(1)-O(2)#1 | 2.352(3) | Cd(1)-O(3)#2 | 2.365(3) |

**Supplementary Material (ESI) for CrystEngComm**  
**This journal is © The Royal Society of Chemistry**

---

|                     |            |                     |            |
|---------------------|------------|---------------------|------------|
| Cd(1)-N(1)          | 2.360(3)   | Cd(1)-N(2)#3        | 2.395(3)   |
| O(1)-Cd(1)-O(2)#1   | 100.05(10) | O(2)#1-Cd(1)-O(4)#2 | 99.37(10)  |
| O(1)-Cd(1)-N(1)     | 135.75(10) | N(1)-Cd(1)-O(4)#2   | 85.70(10)  |
| O(2)#1-Cd(1)-N(1)   | 90.81(10)  | O(3)#2-Cd(1)-O(4)#2 | 54.19(9)   |
| O(1)-Cd(1)-O(3)#2   | 83.38(10)  | N(2)#3-Cd(1)-O(4)#2 | 86.02(11)  |
| O(2)#1-Cd(1)-O(3)#2 | 91.12(10)  | N(1)-Cd(1)-N(2)#3   | 84.21(11)  |
| N(1)-Cd(1)-O(3)#2   | 139.59(10) | O(3)#2-Cd(1)-N(2)#3 | 96.40(10)  |
| O(1)-Cd(1)-N(2)#3   | 79.76(11)  | O(1)-Cd(1)-O(4)#2   | 133.31(10) |
| O(2)#1-Cd(1)-N(2)#3 | 172.39(10) |                     |            |

Symmetry code for **7**: #1  $-x + 1, -y, -z + 2$ ; #2  $x, y + 1, z$ ; #3  $-x, -y, -z + 1$

**Complex 8**

|                     |            |                     |            |
|---------------------|------------|---------------------|------------|
| Cd(1)-O(1)          | 2.2750(16) | Cd(1)-O(4)#2        | 2.3785(16) |
| Cd(1)-N(1)          | 2.3365(18) | Cd(1)-N(2)#3        | 2.434(2)   |
| Cd(1)-O(2)#1        | 2.3598(17) | Cd(1)-O(3)#1        | 2.4346(17) |
| O(1)-Cd(1)-N(1)     | 129.53(6)  | O(1)-Cd(1)-O(3)#1   | 136.54(6)  |
| O(1)-Cd(1)-O(2)#1   | 87.15(6)   | N(1)-Cd(1)-O(3)#1   | 89.58(6)   |
| N(1)-Cd(1)-O(2)#1   | 143.10(6)  | O(2)#1-Cd(1)-O(3)#1 | 54.67(6)   |
| O(1)-Cd(1)-O(4)#2   | 100.25(6)  | O(4)#2-Cd(1)-O(3)#1 | 99.65(6)   |
| N(1)-Cd(1)-O(4)#2   | 87.31(6)   | N(2)#3-Cd(1)-O(3)#1 | 80.25(6)   |
| O(2)#1-Cd(1)-O(4)#2 | 89.94(6)   | O(2)#1-Cd(1)-N(2)#3 | 94.55(7)   |
| O(1)-Cd(1)-N(2)#3   | 83.43(7)   | O(4)#2-Cd(1)-N(2)#3 | 174.35(6)  |
| N(1)-Cd(1)-N(2)#3   | 87.04(7)   |                     |            |

Symmetry code for **8**: #1  $x + 1, y, z$ ; #2  $-x, -y, -z$ ; #3  $x - 1, y + 1, z$

**Complex 9**

|                      |            |                      |            |
|----------------------|------------|----------------------|------------|
| Cu(1)-O(8)#1         | 1.9637(19) | Cu(2)-O(5)           | 2.0380(19) |
| Cu(1)-O(7)#2         | 1.9707(18) | Cu(2)-O(9)#5         | 2.314(2)   |
| Cu(1)-O(2)#3         | 1.975(2)   | Cu(2)-O(6)           | 2.006(2)   |
| Cu(1)-O(1)           | 1.978(2)   | N(1)-Cu(2)           | 1.986(2)   |
| Cu(1)-N(4)#4         | 2.181(2)   | Cu(2)-O(3)           | 1.936(2)   |
| N(4)#4-Cu(1)-Cu(1)#3 | 172.47(7)  | O(3)-Cu(2)-N(1)      | 96.34(10)  |
| O(8)#1-Cu(1)-O(7)#2  | 167.02(8)  | O(3)-Cu(2)-O(6)      | 160.21(9)  |
| O(8)#1-Cu(1)-O(2)#3  | 89.47(9)   | N(1)-Cu(2)-O(6)      | 96.86(9)   |
| O(7)#2-Cu(1)-O(2)#3  | 87.18(9)   | O(3)-Cu(2)-O(5)      | 100.75(8)  |
| O(8)#1-Cu(1)-O(1)    | 89.10(9)   | N(1)-Cu(2)-O(5)      | 161.85(9)  |
| O(7)#2-Cu(1)-O(1)    | 91.40(9)   | O(6)-Cu(2)-O(5)      | 65.06(8)   |
| O(2)#3-Cu(1)-O(1)    | 167.30(8)  | O(3)-Cu(2)-O(9)#5    | 99.95(8)   |
| O(8)#1-Cu(1)-N(4)#4  | 97.15(8)   | N(1)-Cu(2)-O(9)#5    | 90.28(9)   |
| O(7)#2-Cu(1)-N(4)#4  | 95.76(8)   | O(6)-Cu(2)-O(9)#5    | 94.67(9)   |
| O(2)#3-Cu(1)-N(4)#4  | 99.23(9)   | O(5)-Cu(2)-O(9)#5    | 92.73(8)   |
| O(1)-Cu(1)-N(4)#4    | 93.47(9)   | O(2)#3-Cu(1)-Cu(1)#3 | 88.28(6)   |
| O(8)#1-Cu(1)-Cu(1)#3 | 83.30(6)   | O(1)-Cu(1)-Cu(1)#3   | 79.02(6)   |
| O(7)#2-Cu(1)-Cu(1)#3 | 84.06(6)   |                      |            |

Symmetry code for **9**: #1  $x + 1, y + 1, z$ ; #2  $-x, -y - 1, -z$ ; #3  $-x + 1, -y, -z$ ; #4  $x + 1, y + 1, z + 1$ ;  
#5  $-x - 1, -y - 1, -z - 1$

**Supplementary Material (ESI) for CrystEngComm**  
**This journal is © The Royal Society of Chemistry**

**Table S2.** Selected hydrogen-bonding geometry ( $\text{\AA}$ ,  $^\circ$ ) for complex **1**, **3**, **7**, **8**

| Complex  | D–H $\cdots$ A           | D–H  | H $\cdots$ A | D $\cdots$ A | D–H $\cdots$ A |
|----------|--------------------------|------|--------------|--------------|----------------|
| <b>1</b> | N(1)–H(1A) $\cdots$ O(6) | 0.86 | 2.10         | 2.9457       | 166            |
| <b>3</b> | N(3)–H(3A) $\cdots$ O(4) | 0.86 | 2.17         | 2.8961       | 142            |
| <b>7</b> | N(4)–H(4B) $\cdots$ O(3) | 0.86 | 2.15         | 2.9378       | 151            |
| <b>8</b> | N(3)–H(3B) $\cdots$ O(6) | 0.86 | 2.22         | 2.9803       | 148            |

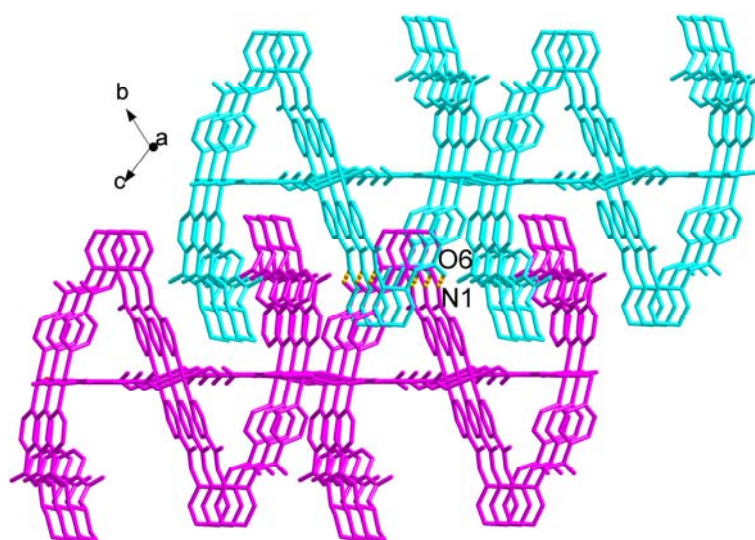

**Fig. S1** View of 3D supramolecular architecture of **1**.

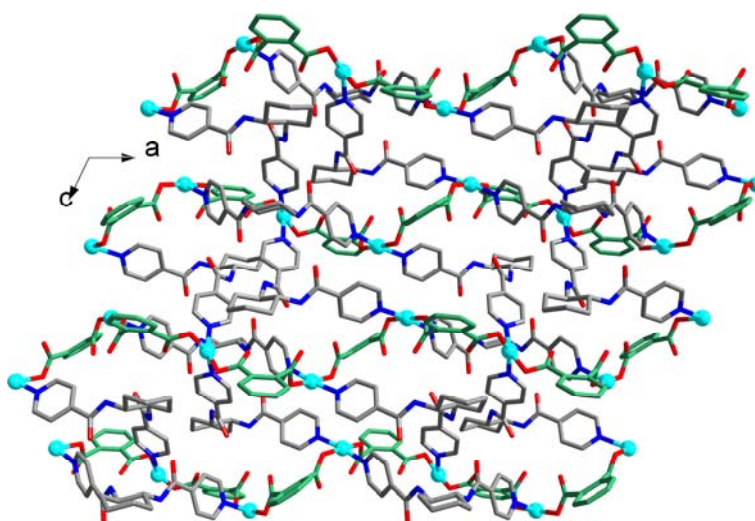

**Fig. S2** View of the 2D layer in **2**.

**Supplementary Material (ESI) for CrystEngComm**  
**This journal is © The Royal Society of Chemistry**

---

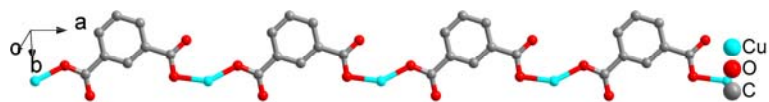

**Fig. S3** View of 1D [Cu-1,3-BDC]<sub>n</sub> chain in **3**.

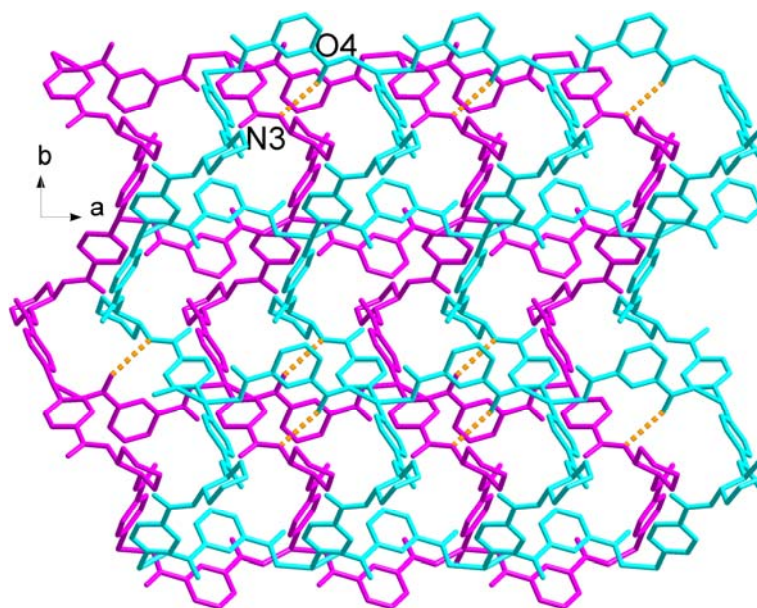

**Fig. S4** View of 3D supramolecular architecture of **3**.

Supplementary Material (ESI) for CrystEngComm  
This journal is © The Royal Society of Chemistry

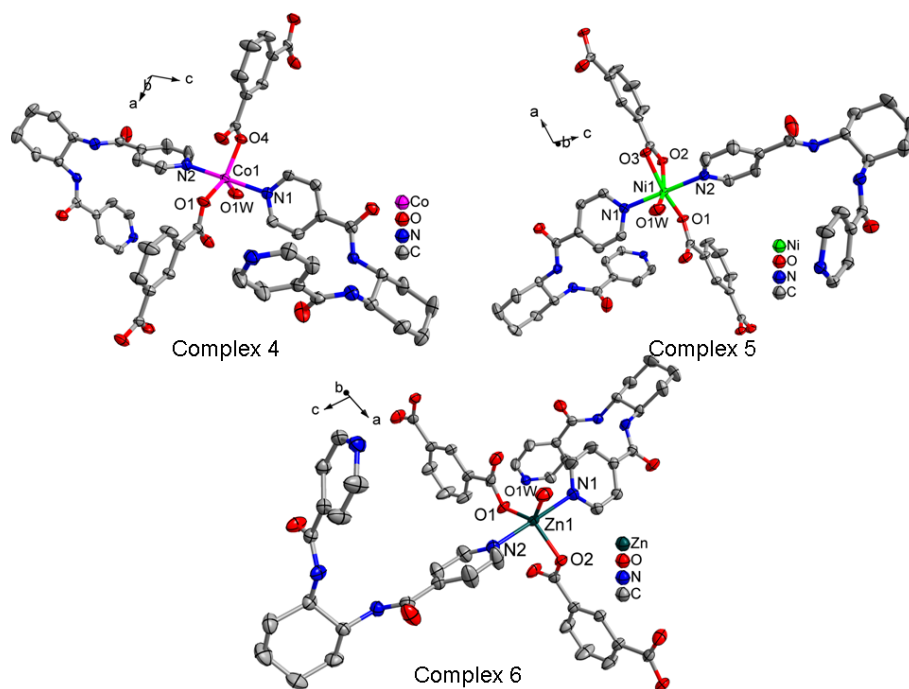

Fig. S5 The coordination geometries of the metal ions in 4–6.

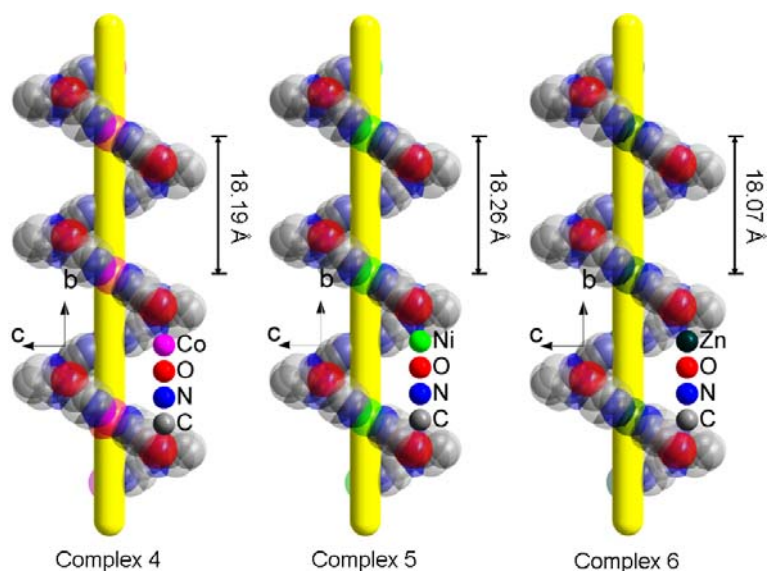

Fig. S6 View of the right-handed helix chains in 4–6.



Supplementary Material (ESI) for CrystEngComm  
This journal is © The Royal Society of Chemistry

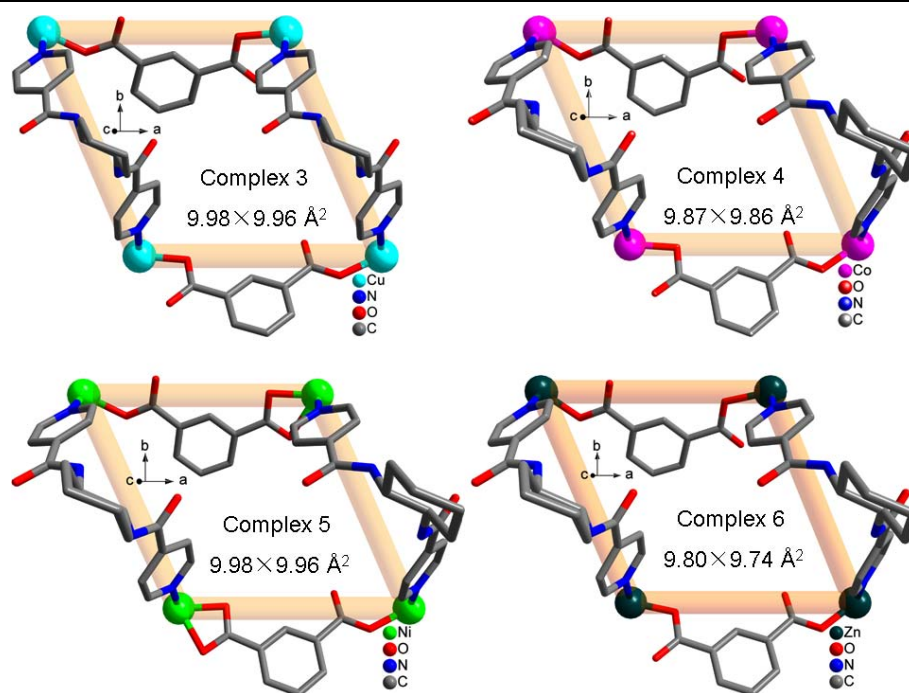

**Fig. S7** The  $[M_4(4\text{-bpah})_2(1,3\text{-BDC})_2]$  rings with similar sizes in complexes 3–6 ( $M = \text{Cu(II)/Co(II)/Ni(II)/Zn(II)}$ ).

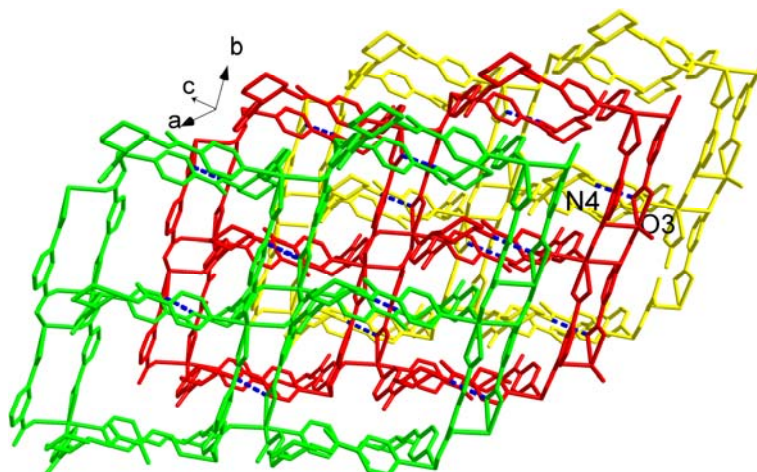

**Fig. S8** View of 3D supramolecular architecture of 7

Supplementary Material (ESI) for CrystEngComm  
This journal is © The Royal Society of Chemistry

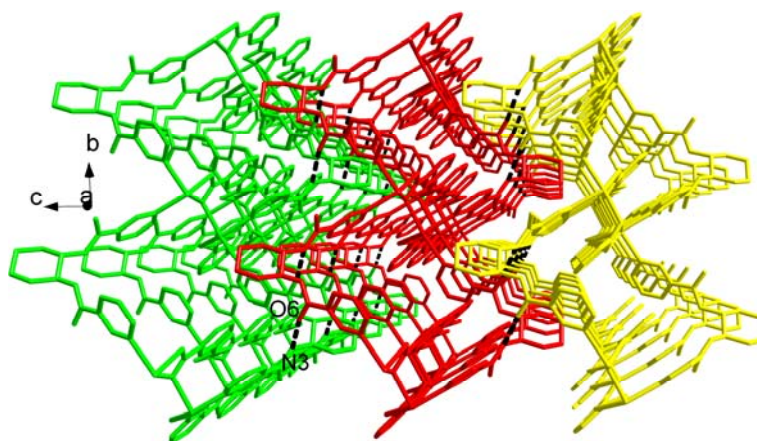

Fig. S9 View of 3D supramolecular architecture of **8**.

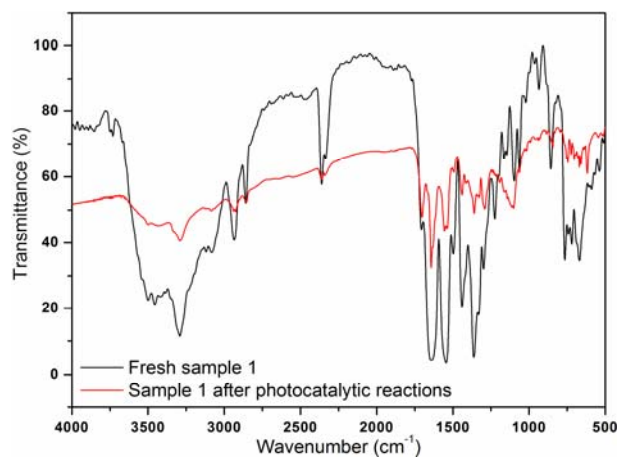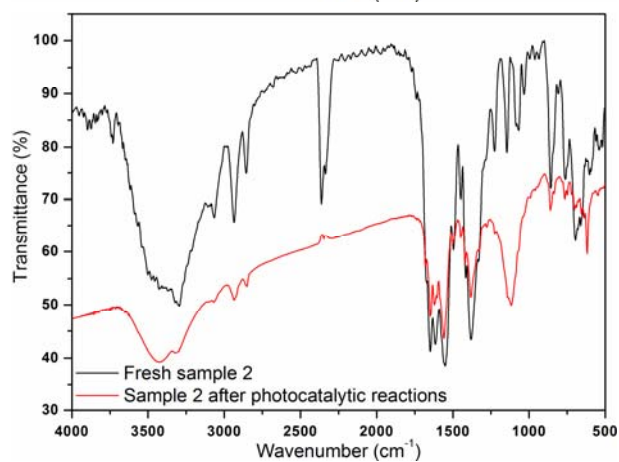



**Supplementary Material (ESI) for CrystEngComm**  
**This journal is © The Royal Society of Chemistry**

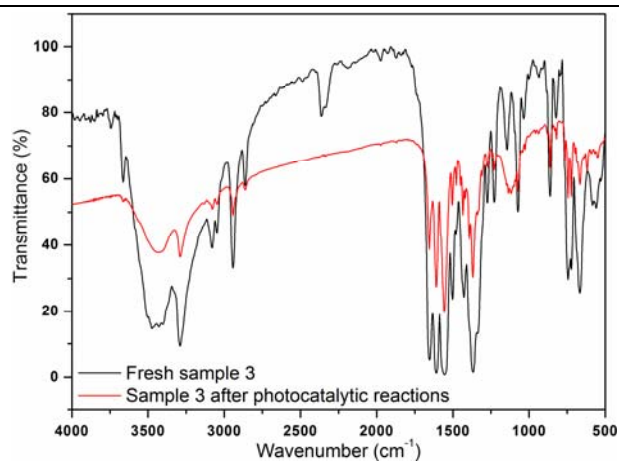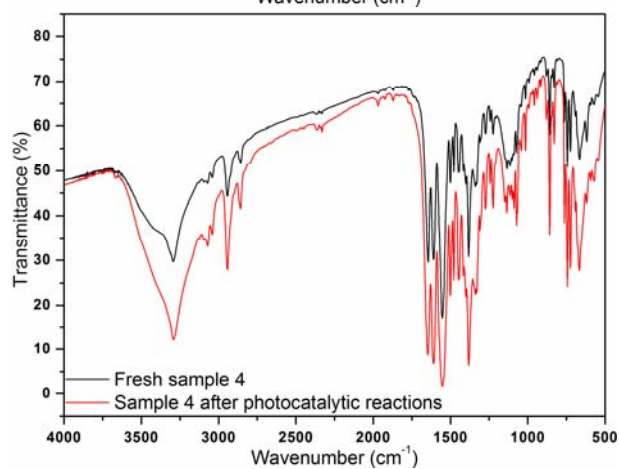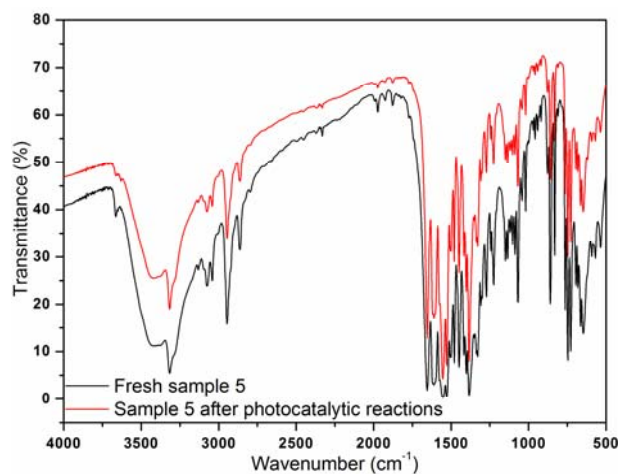

**Supplementary Material (ESI) for CrystEngComm**  
**This journal is © The Royal Society of Chemistry**

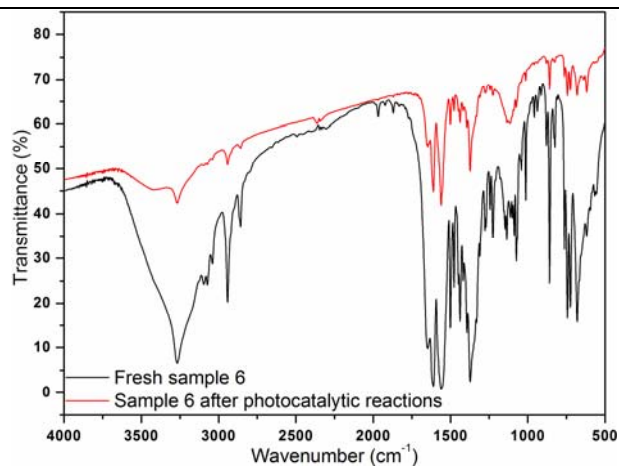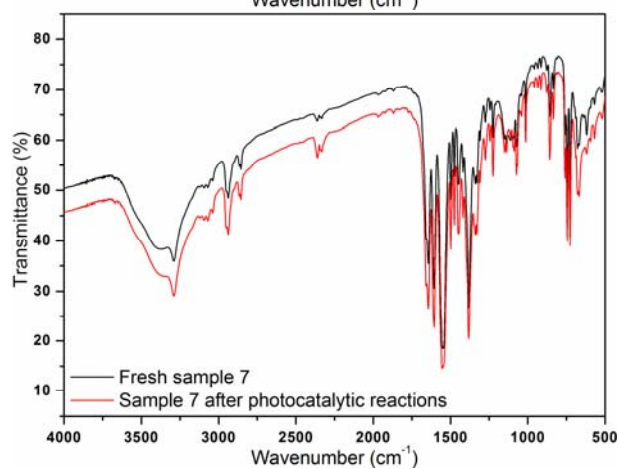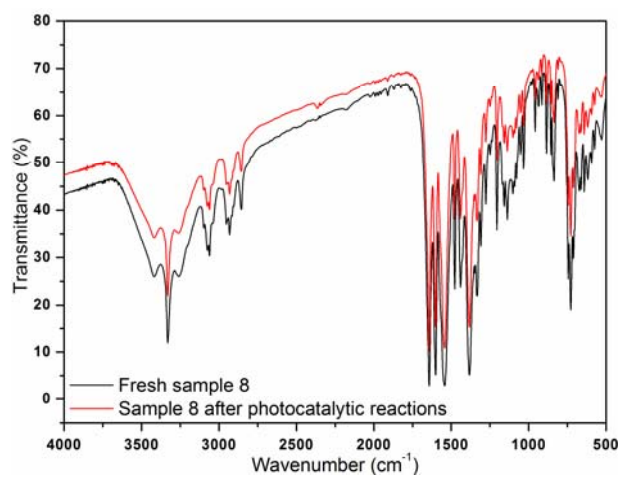

**Supplementary Material (ESI) for CrystEngComm**  
**This journal is © The Royal Society of Chemistry**

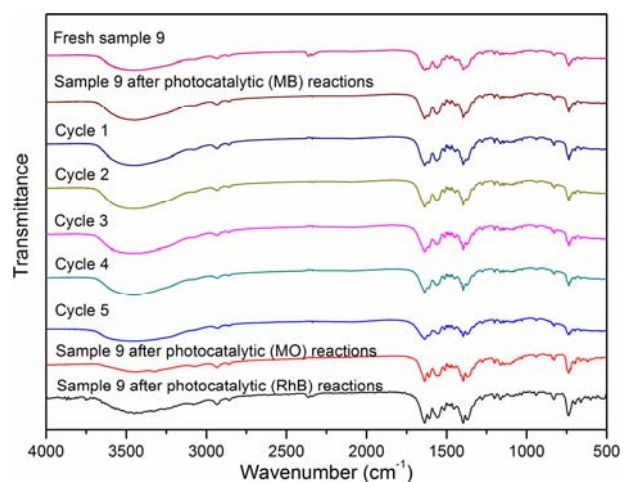

**Fig. S10** The IR spectra of complexes 1–9 and after photocatalytic reactions.

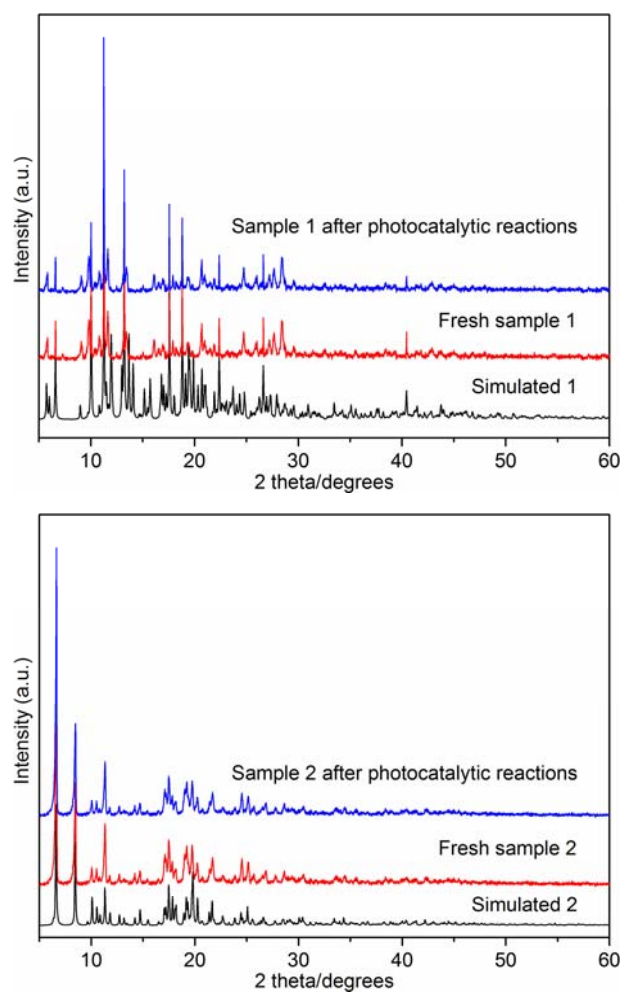

**Supplementary Material (ESI) for CrystEngComm**  
**This journal is © The Royal Society of Chemistry**

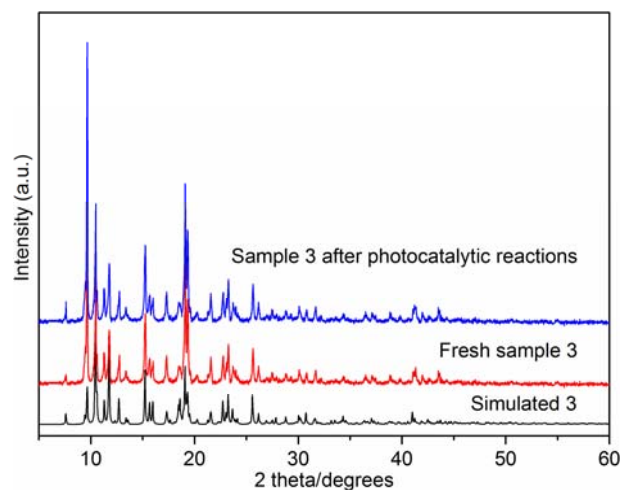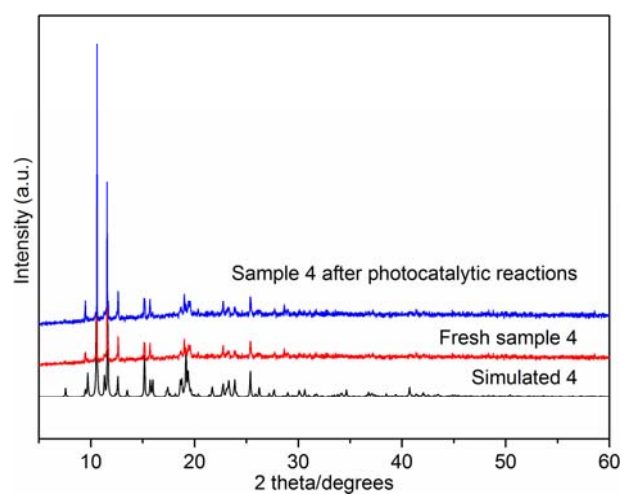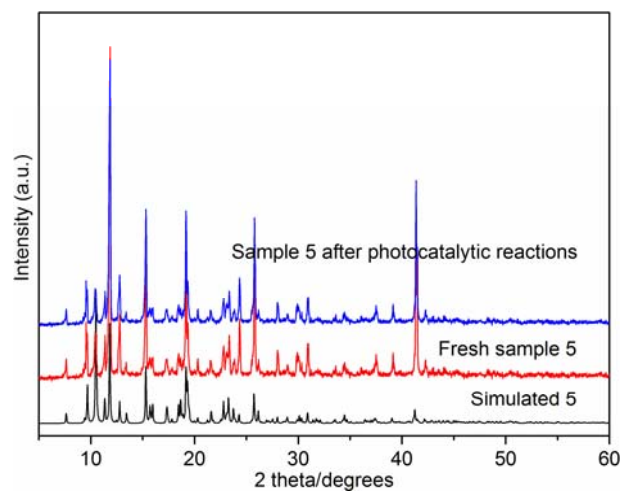

**Supplementary Material (ESI) for CrystEngComm**  
**This journal is © The Royal Society of Chemistry**

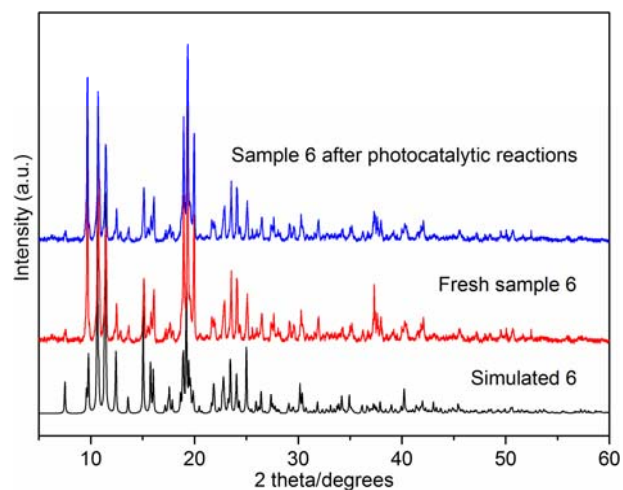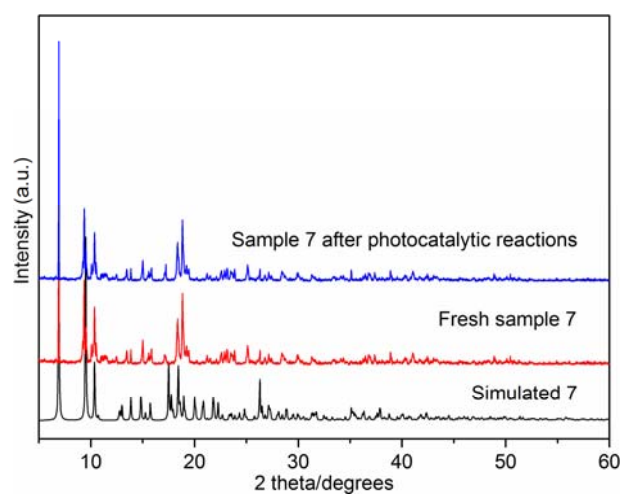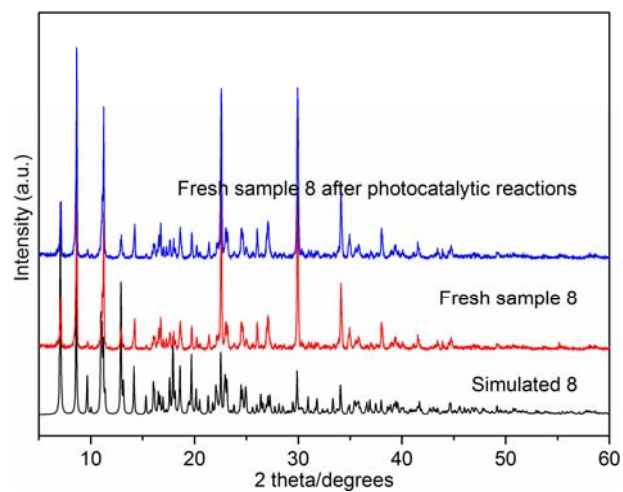



**Supplementary Material (ESI) for CrystEngComm**  
**This journal is © The Royal Society of Chemistry**

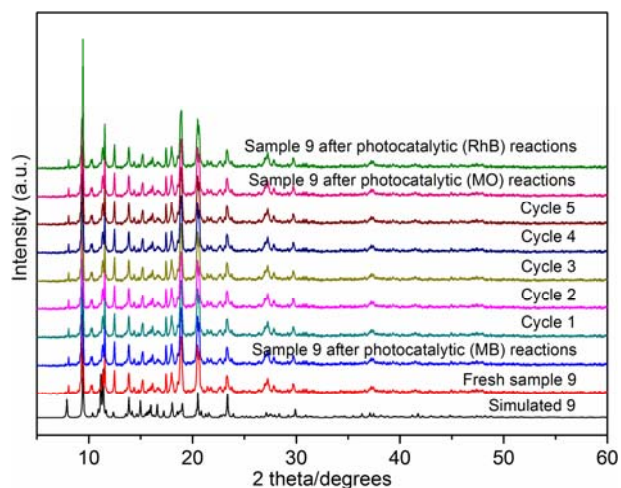

**Figure S11** The powder X-ray diffraction patterns of simulated, fresh samples, and samples after photocatalytic experiments for complexes 1–9.

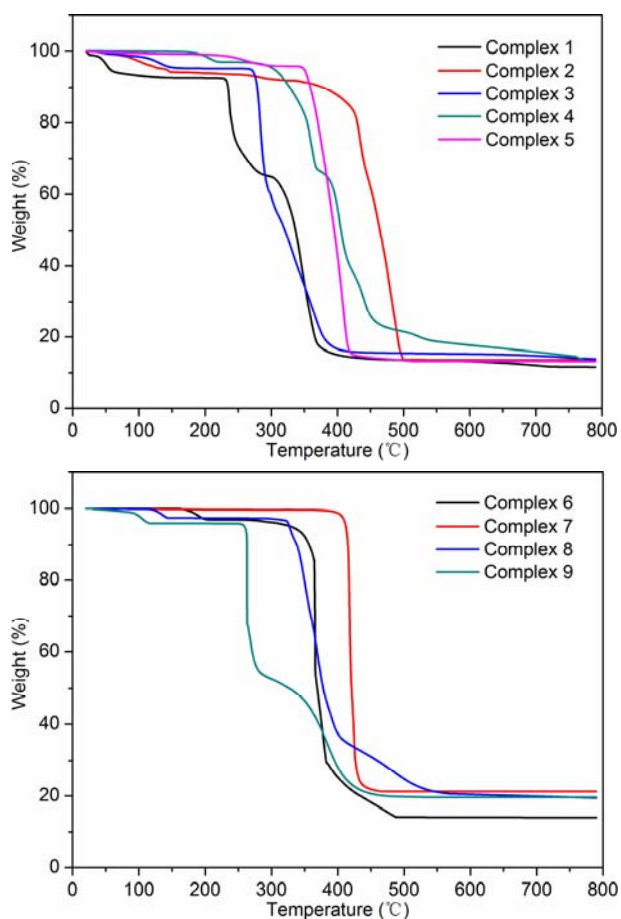

**Fig. S12** The TG curves of complexes 1–9.

**Supplementary Material (ESI) for CrystEngComm**  
**This journal is © The Royal Society of Chemistry**

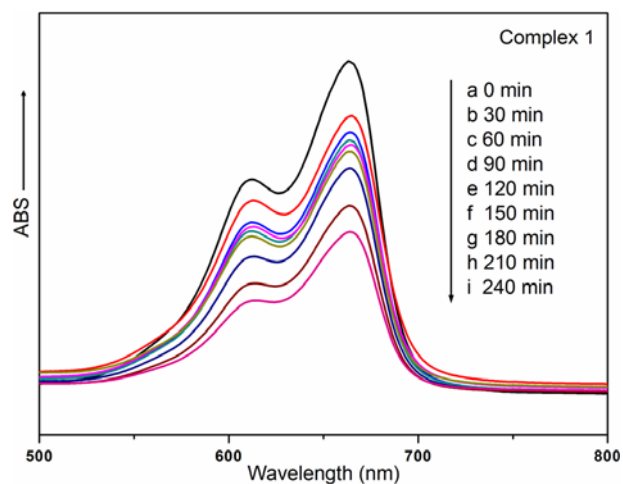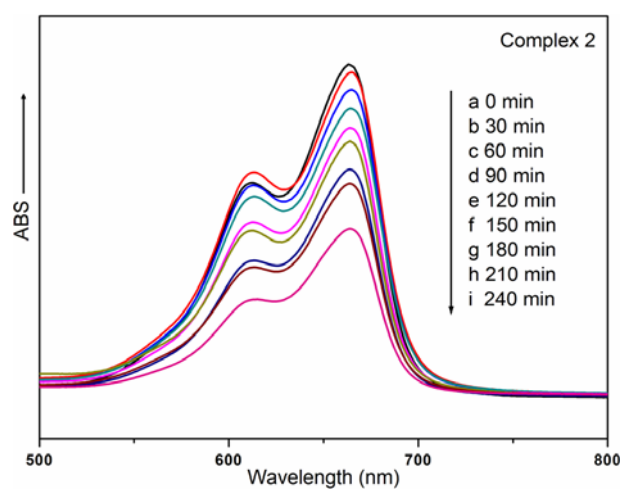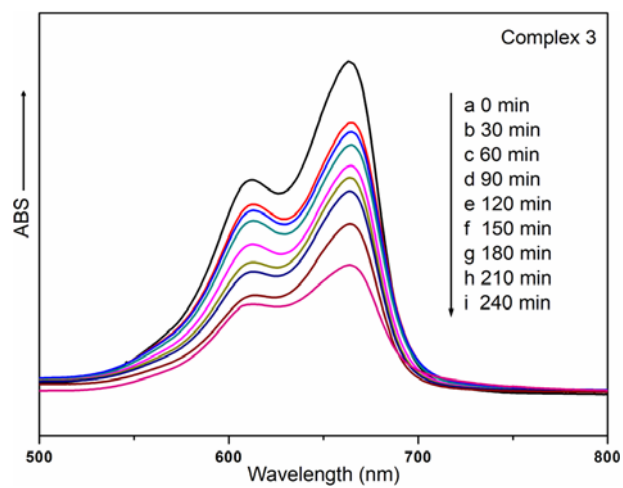

**Supplementary Material (ESI) for CrystEngComm**  
**This journal is © The Royal Society of Chemistry**

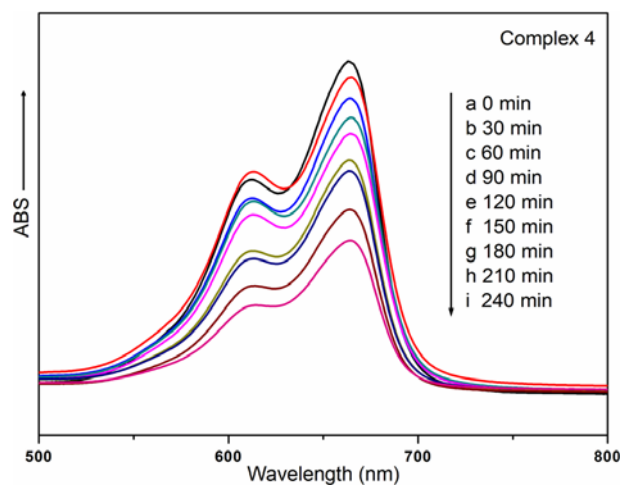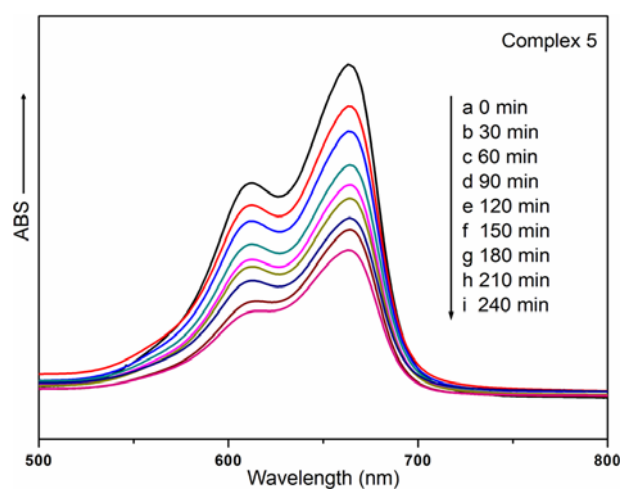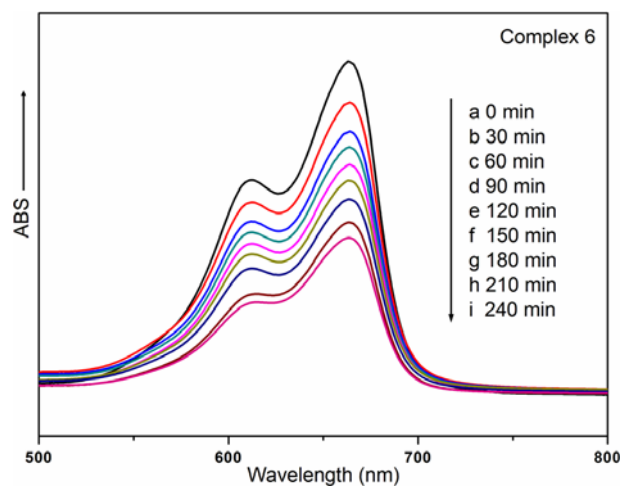

Supplementary Material (ESI) for CrystEngComm  
This journal is © The Royal Society of Chemistry

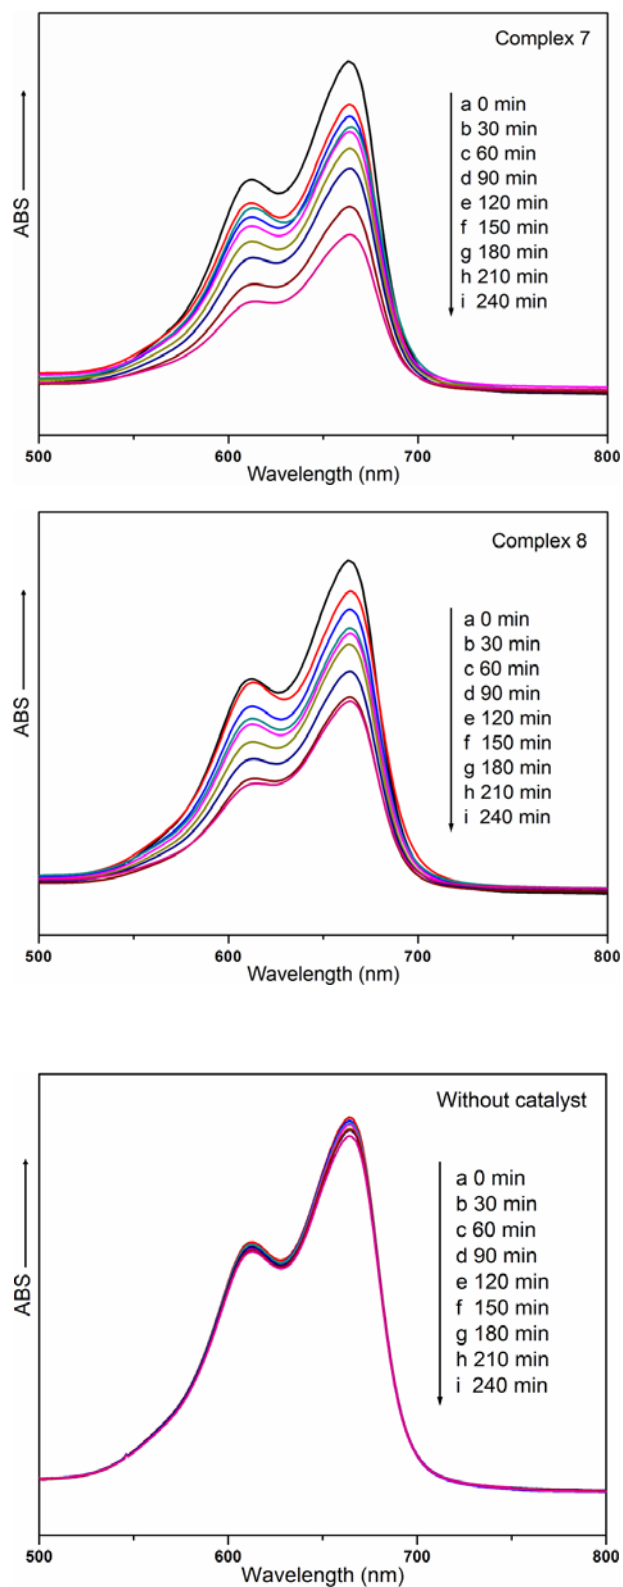

**Fig. S13** Absorption spectra of the MB solution during the decomposition reaction under UV irradiation with the presence of complexes **1–8**, and without catalyst.

**Supplementary Material (ESI) for CrystEngComm**  
**This journal is © The Royal Society of Chemistry**

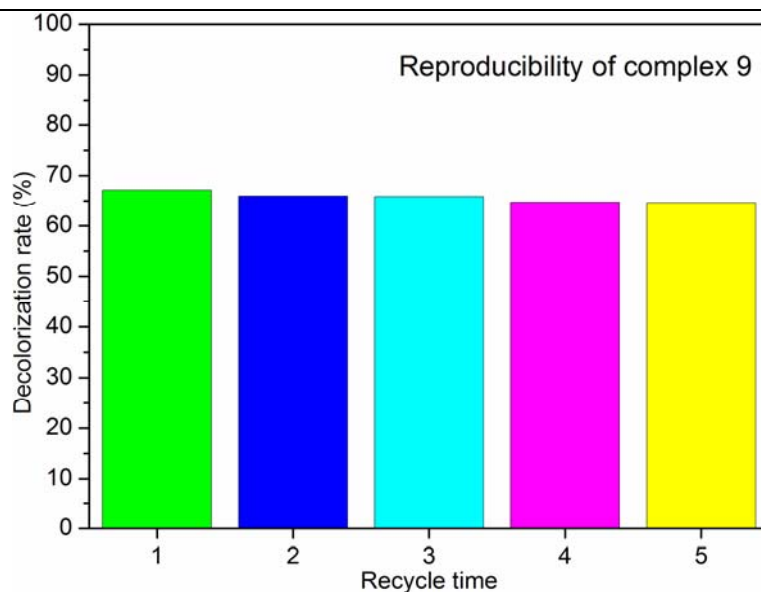

**Fig. S14** Cycling runs of **9** in the degradation of MB solution.

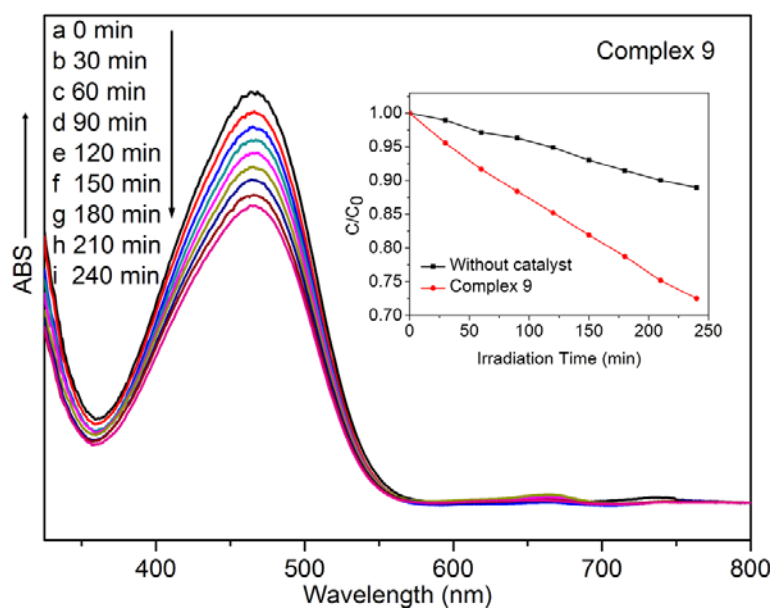

**Fig. S15** Absorption spectra of the MO solution during the decomposition reaction under UV irradiation with the presence of complex **9**. The inset shows photocatalytic decomposition rates of MO solution under UV irradiation with the use of complex **9** and no crystal in the same conditions.



**Supplementary Material (ESI) for CrystEngComm**  
**This journal is © The Royal Society of Chemistry**

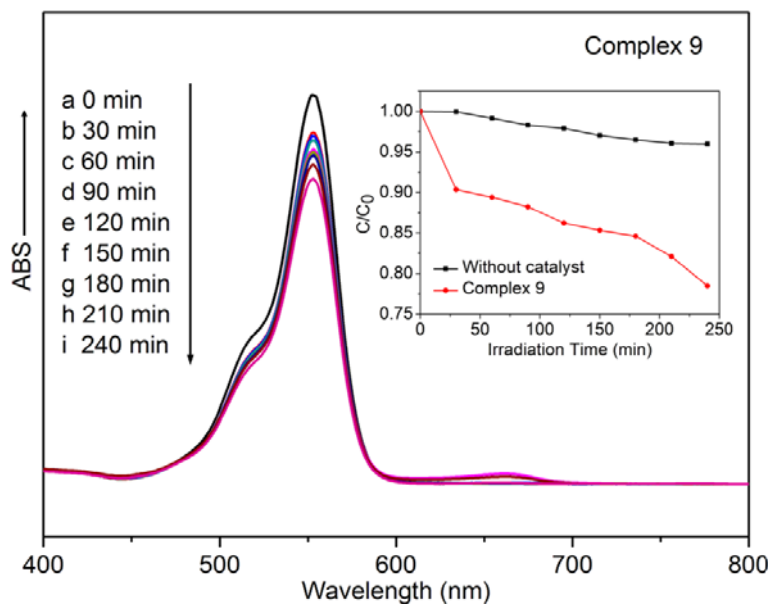

**Fig. S16** Absorption spectra of the RhB solution during the decomposition reaction under UV irradiation with the presence of complex **9**. The inset shows photocatalytic decomposition rates of RhB solution under UV irradiation with the use of complex **9** and no crystal in the same conditions.
